# Supplementary material
Source: PubMed Central journal article supplement (PMC6126930)
Supplement: NIHMS1500451-supplement-2.pdf [file NIHMS1500451-supplement-2.pdf]

| Score | Description of Histological Scoring           | Inflammatory Infiltration                                                                              | Stromal Remodeling                                                                    |
|-------|-----------------------------------------------|--------------------------------------------------------------------------------------------------------|---------------------------------------------------------------------------------------|
| 0     | No cells in Field of View (FOV)               | 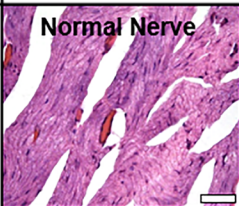 <p>Normal Nerve</p> |    |
| 1     | Minimal Change: Cells account for <25% FOV    |                      |    |
| 2     | Mild Change: Cells account for 25-50% FOV     |                     |   |
| 3     | Moderate Change: Cells account for 51-75% FOV |                    |  |
| 4     | Severe Change: Cells account for >75% FOV     |                    |  |
| 5     | Complete Remodel                              |                    |  |
