# Supplementary material
Source: PubMed Central journal article supplement (PMC6126930)

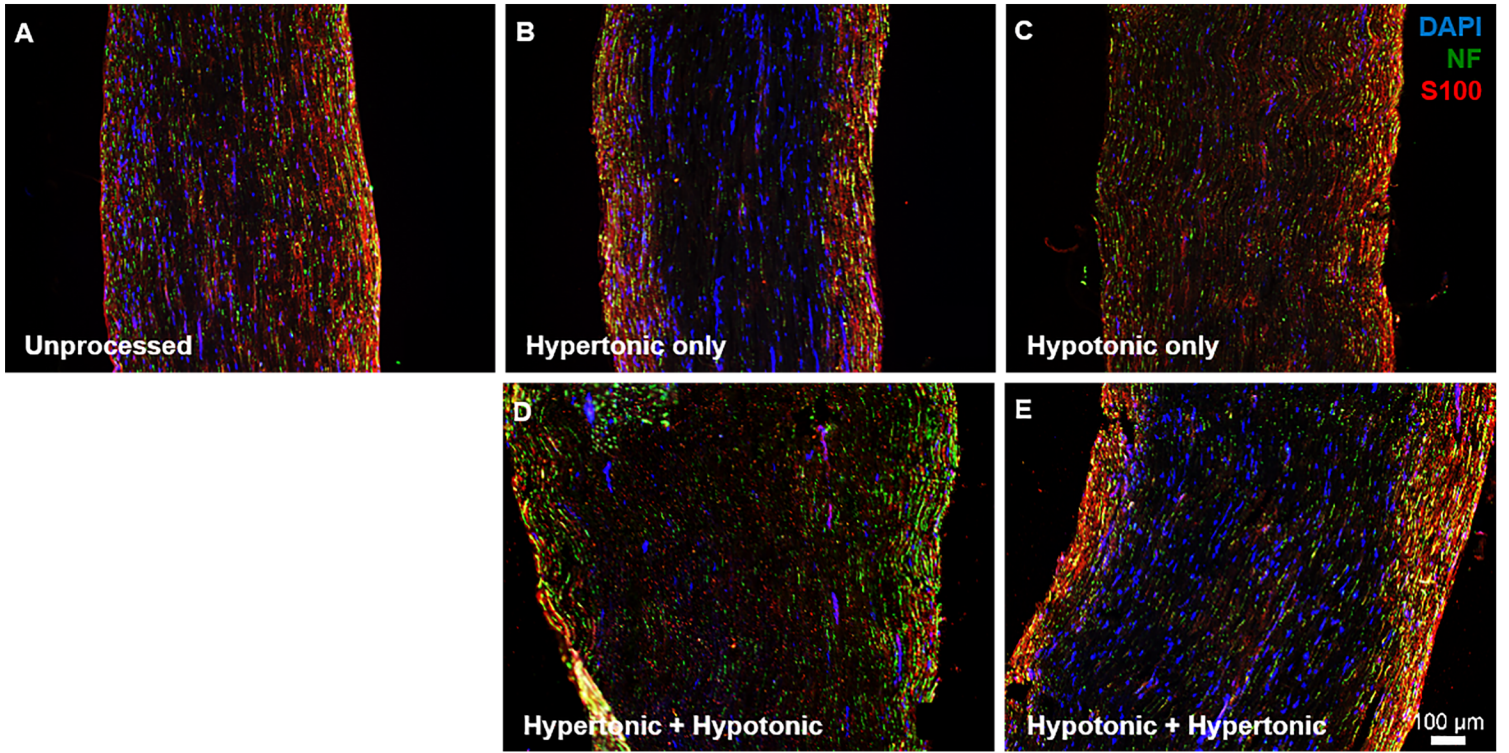

Supplement: NIHMS1500451-supplement-1.pdf [file NIHMS1500451-supplement-1.pdf]
